# Supplementary material for: Chemically programmed self-sorting of gelator networks
Source: Springer Nature journal article supplement (doi:10.1038/ncomms2499), 2013-02-12
Supplement: 41467_2013_BFncomms2499_MOESM7_ESM.mol [file 41467_2013_BFncomms2499_MOESM7_ESM.mol]

  ChemDraw01281311022D

 27 28  0  0  0  0  0  0  0  0999 V2000
    3.5712    0.4111    0.0000 C   0  0  0  0  0  0  0  0  0  0  0  0
    2.8567    0.8236    0.0000 C   0  0  0  0  0  0  0  0  0  0  0  0
    2.8567    1.6486    0.0000 C   0  0  0  0  0  0  0  0  0  0  0  0
    3.5712   -0.4139    0.0000 O   0  0  0  0  0  0  0  0  0  0  0  0
    4.2856    0.8236    0.0000 O   0  0  0  0  0  0  0  0  0  0  0  0
    1.4277    0.8236    0.0000 C   0  0  0  0  0  0  0  0  0  0  0  0
    0.7133    0.4111    0.0000 C   0  0  0  0  0  0  0  0  0  0  0  0
    1.4277    1.6486    0.0000 O   0  0  0  0  0  0  0  0  0  0  0  0
    2.1422    0.4111    0.0000 N   0  0  0  0  0  0  0  0  0  0  0  0
   -0.0012    0.8236    0.0000 O   0  0  0  0  0  0  0  0  0  0  0  0
   -1.4301    0.8236    0.0000 C   0  0  0  0  0  0  0  0  0  0  0  0
   -0.7157    0.4111    0.0000 C   0  0  0  0  0  0  0  0  0  0  0  0
   -0.7157   -0.4139    0.0000 C   0  0  0  0  0  0  0  0  0  0  0  0
   -1.4301   -0.8264    0.0000 C   0  0  0  0  0  0  0  0  0  0  0  0
   -2.1446   -0.4139    0.0000 C   0  0  0  0  0  0  0  0  0  0  0  0
   -2.8591   -0.8264    0.0000 C   0  0  0  0  0  0  0  0  0  0  0  0
   -3.5736   -0.4139    0.0000 C   0  0  0  0  0  0  0  0  0  0  0  0
   -3.5736    0.4111    0.0000 C   0  0  0  0  0  0  0  0  0  0  0  0
   -2.8591    0.8236    0.0000 C   0  0  0  0  0  0  0  0  0  0  0  0
   -2.1446    0.4111    0.0000 C   0  0  0  0  0  0  0  0  0  0  0  0
   -1.4301    1.6458    0.0000 H   0  0  0  0  0  0  0  0  0  0  0  0
   -2.8591    1.6458    0.0000 D   0  0  0  0  0  0  0  0  0  0  0  0
   -4.2856    0.8222    0.0000 D   0  0  0  0  0  0  0  0  0  0  0  0
   -4.2856   -0.8250    0.0000 D   0  0  0  0  0  0  0  0  0  0  0  0
   -2.8591   -1.6486    0.0000 D   0  0  0  0  0  0  0  0  0  0  0  0
   -1.4301   -1.6486    0.0000 D   0  0  0  0  0  0  0  0  0  0  0  0
   -0.0036   -0.8250    0.0000 D   0  0  0  0  0  0  0  0  0  0  0  0
  1  2  1  0      
  2  3  1  0      
  1  4  2  0      
  1  5  1  0      
  6  7  1  0      
  6  8  2  0      
  6  9  1  0      
 11 12  1  0      
 12 13  2  0      
 13 14  1  0      
 14 15  2  0      
 15 16  1  0      
 16 17  2  0      
 17 18  1  0      
 18 19  2  0      
 19 20  1  0      
 11 20  2  0      
 15 20  1  0      
 10 12  1  0      
  7 10  1  0      
  2  9  1  0      
 11 21  1  0      
 19 22  1  0      
 18 23  1  0      
 17 24  1  0      
 16 25  1  0      
 14 26  1  0      
 13 27  1  0      
M  END
